# Supplementary material for: Impact of Early Salvage Androgen Deprivation Therapy in Localized Prostate Cancer after Radical Prostatectomy: A Propensity Score Matched Analysis
Source: PubMed Central journal article supplement — Yonsei Med J. 2018 Jun 1;59(5):580–7. doi: 10.3349/ymj.2018.59.5.580 (PMC5990681; doi:10.3349/ymj.2018.59.5.580), 2018-06-01
Supplement: ymj-59-580-s001.pdf [file ymj-59-580-s001.pdf]

**Supplementary Table 1.** Univariable and Multivariable analysis of Factors Associated with Cancer-Specific Survival

| Variable                                  | Univariable           |                | Multivariable        |                |
|-------------------------------------------|-----------------------|----------------|----------------------|----------------|
|                                           | HR (95% CI)           | <i>p</i> value | HR (95% CI)          | <i>p</i> value |
| Age                                       | 1.076 (0.978–1.183)   | 0.132          |                      |                |
| BMI                                       | 1.029 (0.783–1.352)   | 0.835          |                      |                |
| Prostate volume measure by TRUS           | 0.986 (0.935–1.039)   | 0.593          |                      |                |
| Risk classification                       |                       | 0.013          |                      | 0.045          |
| Low & intermediate                        | 1 (ref)               |                | 1 (ref)              |                |
| High                                      | 13.775 (1.742–108.91) |                | 9.550 (1.049–86.947) |                |
| PSA                                       |                       | 0.556          |                      |                |
| <20                                       | 1 (ref)               |                |                      |                |
| ≥20                                       | 0.045 (0.0–1403.3)    |                |                      |                |
| Pathologic T stage                        |                       | 0.939          |                      |                |
| Organ confined (T2)                       | 1 (ref)               |                |                      |                |
| Non-organ confined (>T2)                  | 0.953 (0.278–3.269)   |                |                      |                |
| Pathologic Gleason score                  |                       | 0.001          |                      | 0.048          |
| <8                                        | 1 (ref)               |                | 1 (ref)              |                |
| ≥8                                        | 8.114 (2.352–27.988)  |                | 3.688 (1.009–13.484) |                |
| Positive surgical margin                  | 0.892 (0.261–3.051)   | 0.855          |                      |                |
| PSA doubling time                         | 0.877 (0.770–0.999)   | 0.047          | 0.845 (0.685–1.028)  | 0.091          |
| Salvage radiotherapy                      | 0.585 (0.178–1.922)   | 0.377          |                      |                |
| Early salvage ADT vs. delayed salvage ADT |                       | 0.107          |                      |                |
| Delayed salvage                           | 1 (ref)               |                |                      |                |
| Early salvage                             | 0.183 (0.023–1.444)   |                |                      |                |

ADT, androgen deprivation therapy; BMI, body mass index; PSA, prostate-specific antigen; TRUS, transrectal ultrasonography.
