# Supplementary material for: Impact of Early Salvage Androgen Deprivation Therapy in Localized Prostate Cancer after Radical Prostatectomy: A Propensity Score Matched Analysis
Source: PubMed Central journal article supplement — Yonsei Med J. 2018 Jun 1;59(5):580–7. doi: 10.3349/ymj.2018.59.5.580 (PMC5990681; doi:10.3349/ymj.2018.59.5.580), 2018-06-01
Supplement: ymj-59-580-s002.pdf [file ymj-59-580-s002.pdf]

**Supplementary Table 2.** Cox Regression Analysis of Factors Associated with Cancer Specific Survival in Non-Organ Confined Prostate Cancer

| Variable                                   | Univariable           |         |
|--------------------------------------------|-----------------------|---------|
|                                            | HR (95% CI)           | p value |
| Age                                        | 1.022 (0.909–1.148)   | 0.720   |
| BMI                                        | 0.787 (0.538–1.152)   | 0.218   |
| Prostate volume measure by TRUS            | 0.983 (0.912–1.061)   | 0.665   |
| Risk classification                        |                       | 0.170   |
| Low & intermediate                         | 1 (ref)               |         |
| High                                       | 72.700 (0.159–33190)  |         |
| PSA                                        |                       | 0.642   |
| <20                                        | 1 (ref)               |         |
| ≥20                                        | 0.044 (0.000–22547)   |         |
| Pathologic Gleason score                   |                       | 0.006   |
| <8                                         | 1 (ref)               |         |
| ≥8                                         | 10.092 (1.930–52.785) |         |
| Positive surgical margin                   | 0.662 (0.127–3.446)   | 0.624   |
| PSA doubling time                          | 0.813 (0.618–1.069)   | 0.139   |
| Salvage radiotherapy                       | 0.213 (0.041–1.102)   | 0.065   |
| Early salvage ADT vs. standard salvage ADT |                       | 0.251   |
| Delayed salvage                            | 1 (ref)               |         |
| Early salvage                              | 0.022 (0.00–14.719)   |         |

ADT, androgen deprivation therapy; BMI, body mass index; PSA, prostate-specific antigen; TRUS, transrectal ultrasonography.
